# Supplementary material for: Facile One-pot Transformation of Iron Oxides from Fe2O3 Nanoparticles to Nanostructured Fe3O4@C Core-Shell Composites via Combustion Waves
Source: PubMed Central journal article supplement (PMC4763259; doi:10.1038/srep21792), 2016-02-23
Supplement: srep21792-s1.pdf [file srep21792-s1.pdf]

[Supporting information]

**Facile One-pot Transformation of Iron Oxides from Fe<sub>2</sub>O<sub>3</sub> Nanoparticles to Nanostructured Fe<sub>3</sub>O<sub>4</sub>@C Core-Shell Composites via Combustion Waves**

Jungho Shin, Kang Yeol Lee, Taehan Yeo, and Wonjoon Choi\*

School of Mechanical Engineering, Korea University (BK21<sup>+</sup>), Seoul, Korea, 136-701

\*Author to whom correspondence should be addressed: Wonjoon Choi: e-mail: [wojchoi@korea.ac.kr](mailto:wojchoi@korea.ac.kr), Phone: +82 2 3290 5951, Fax: +82 2 926 9290.

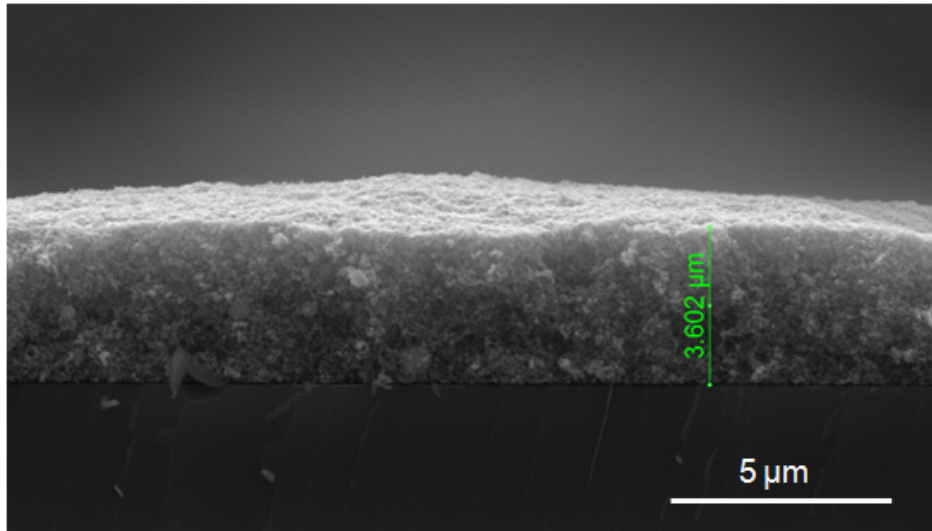

**Figure S1.** Cross-sectional SEM image of a  $\text{Fe}_2\text{O}_3$  film.

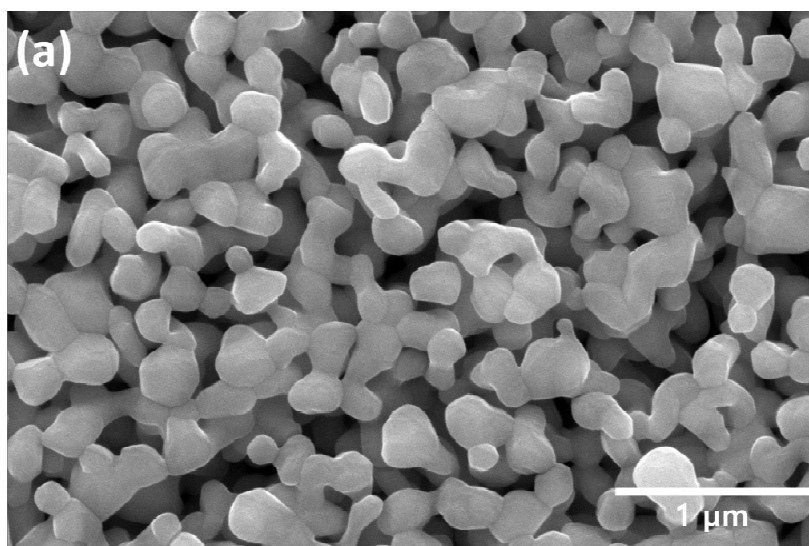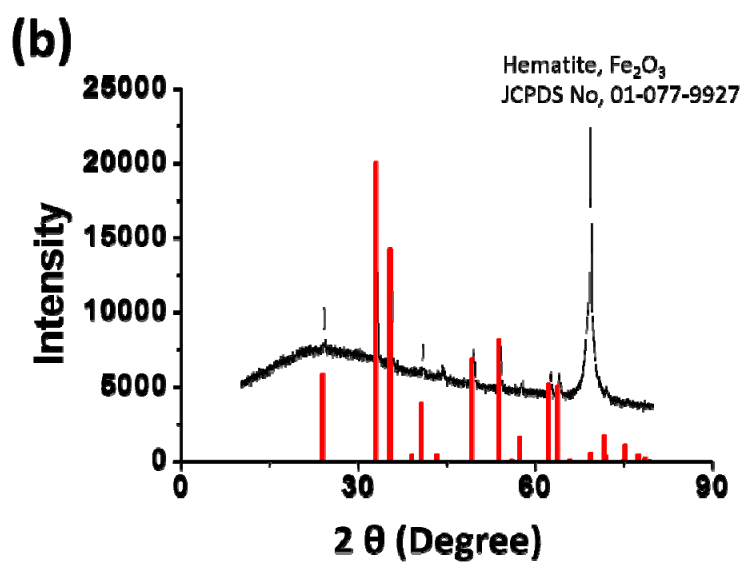

**Figure S2.** (a) SEM image, and (b) XRD pattern after annealing Fe<sub>2</sub>O<sub>3</sub> at 740 °C

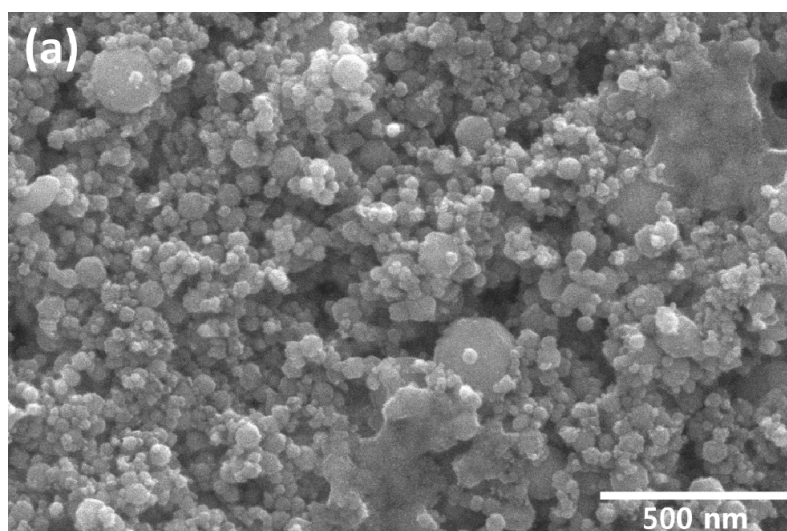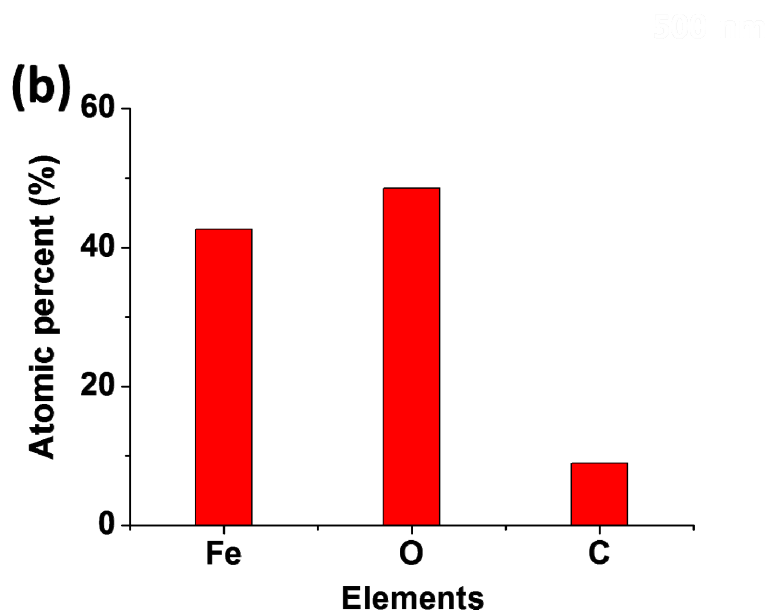

**Figure S3.** (a) SEM image and (b) Atomic percentages of Fe, O, and C from EDX analysis after combustion wave propagation on a dual layer of unmixed chemical fuel and  $\text{Fe}_2\text{O}_3$  nanoparticles.

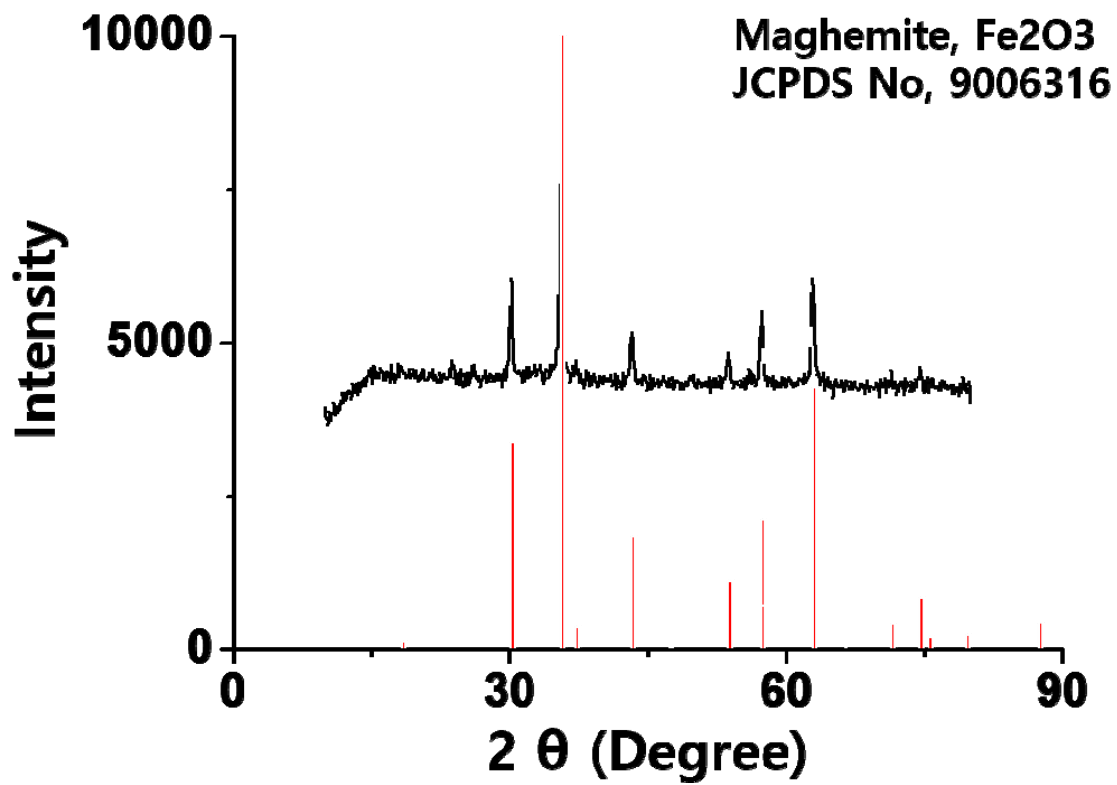

Figure S4. XRD pattern of Fe<sub>2</sub>O<sub>3</sub> films before mixing with collodion.
